# Supplementary material for: Dynamic Shifts in the HIV Proviral Landscape During Long Term Combination Antiretroviral Therapy: Implications for Persistence and Control of HIV Infections
Source: PubMed Central journal article supplement (PMC7077288; doi:10.3390/v12020136), 2020-01-25
Supplement: viruses-12-00136-s001.pdf [file viruses-12-00136-s001.pdf]

RECENT

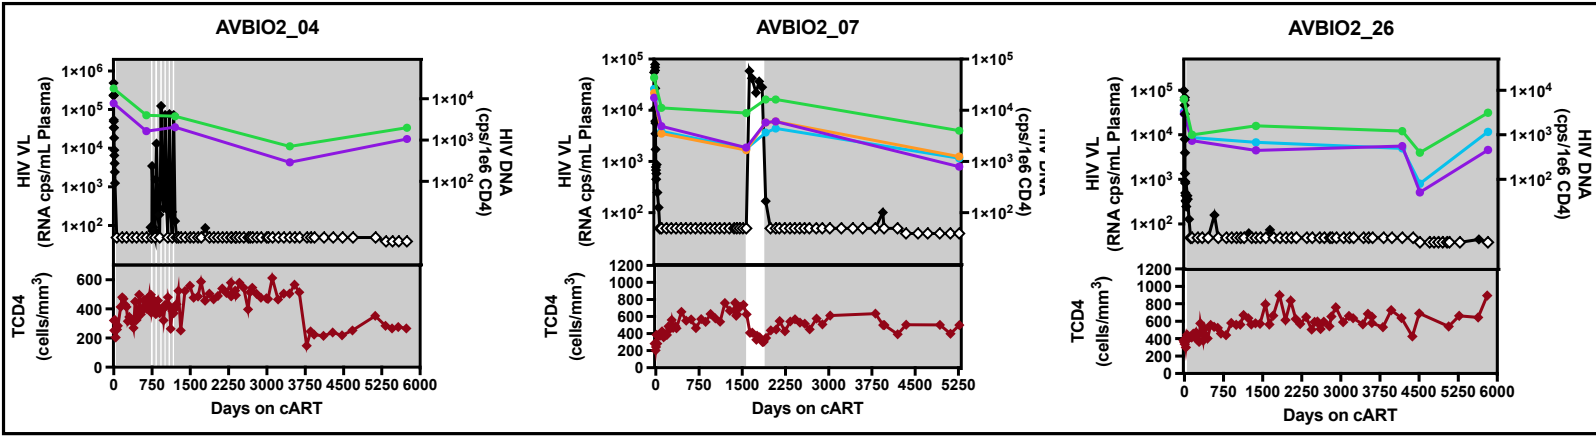

CHRONIC

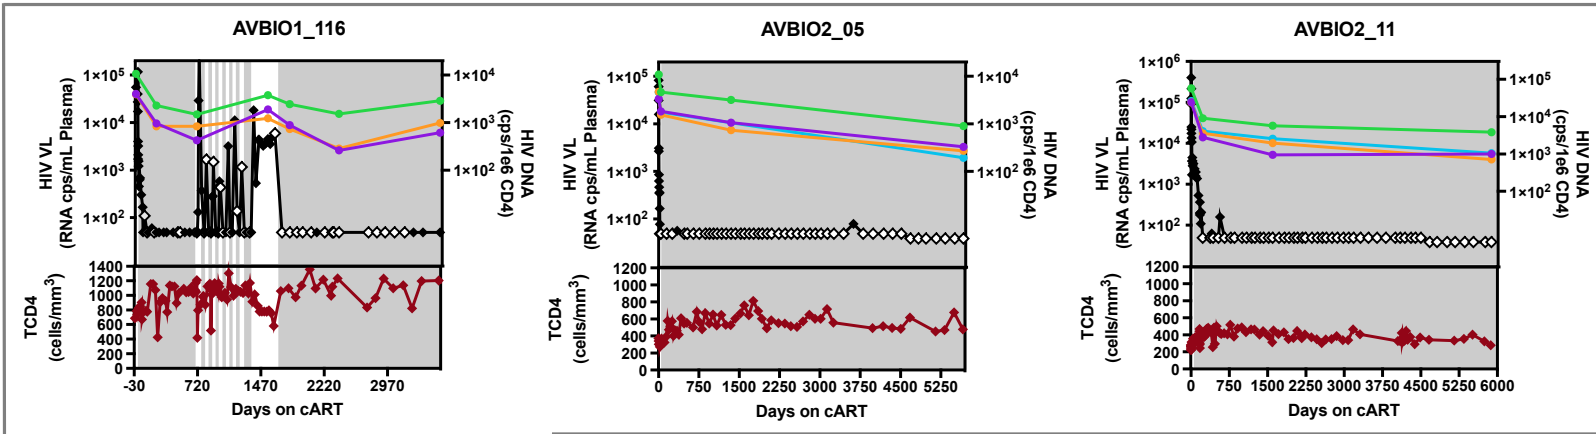

AIDS

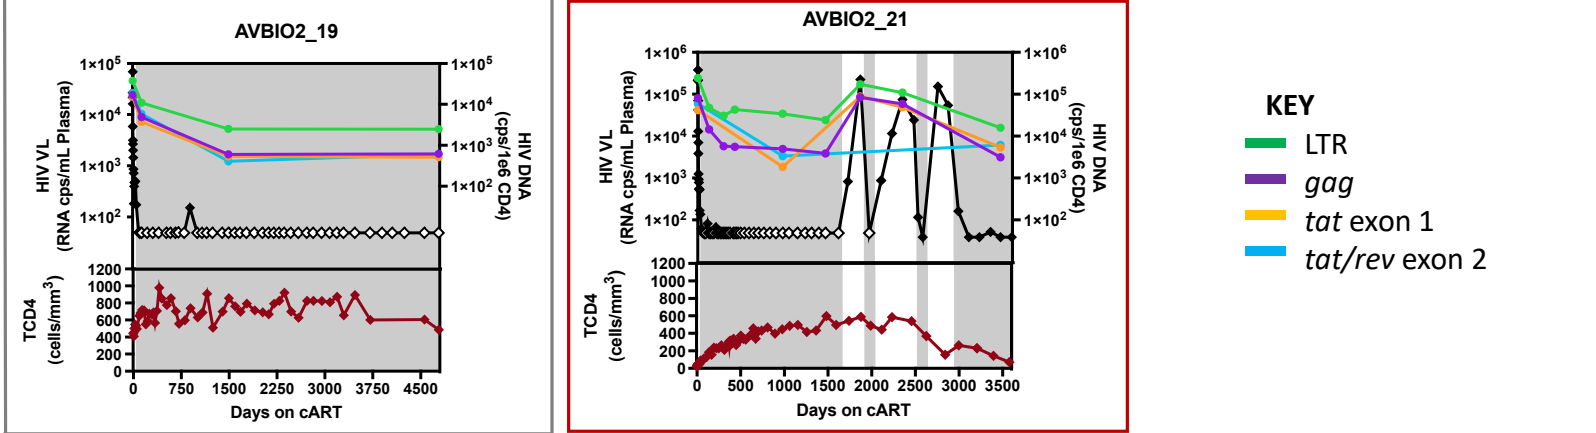

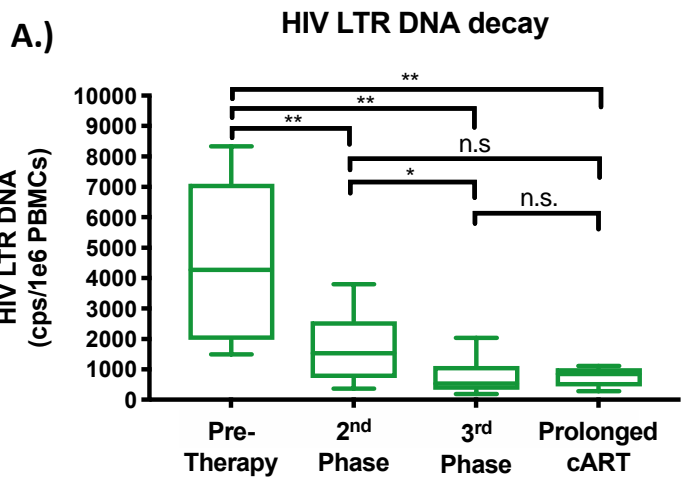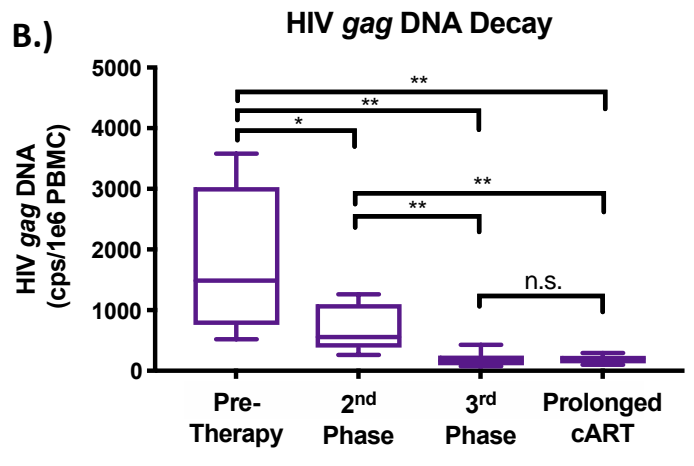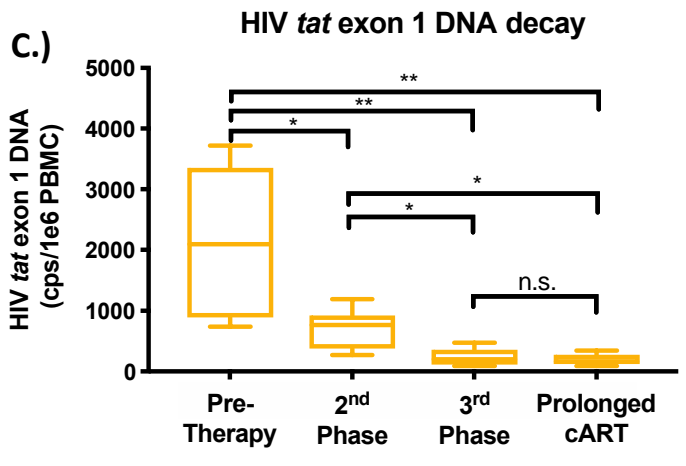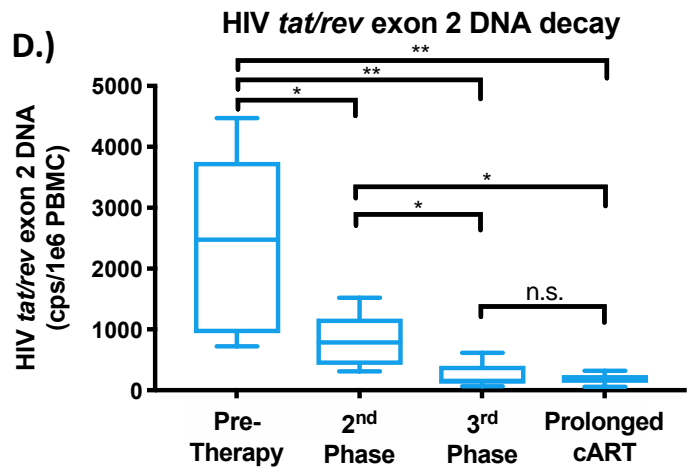

Supplemental Figure 3a

RECENT

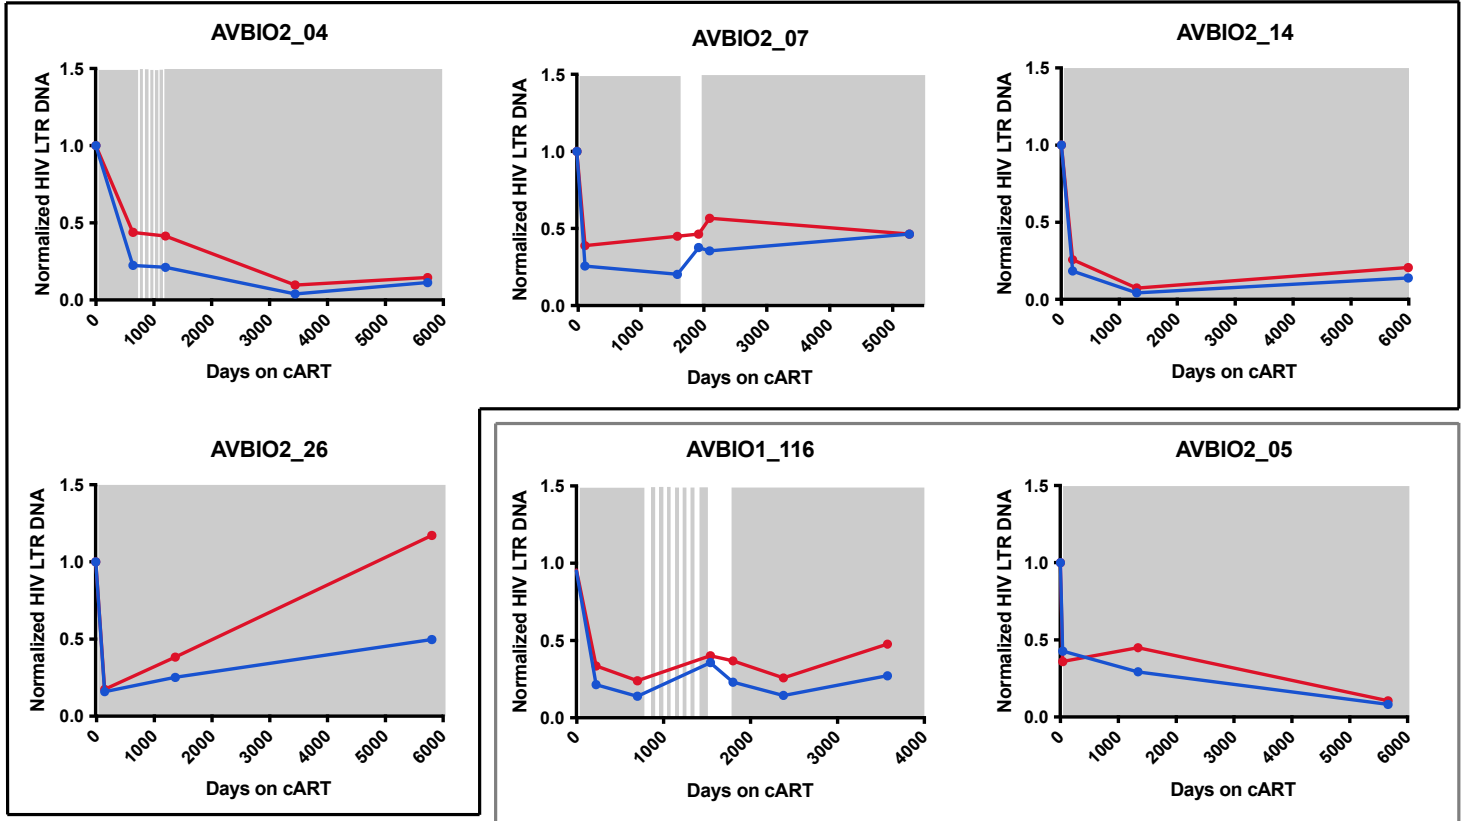

CHRONIC

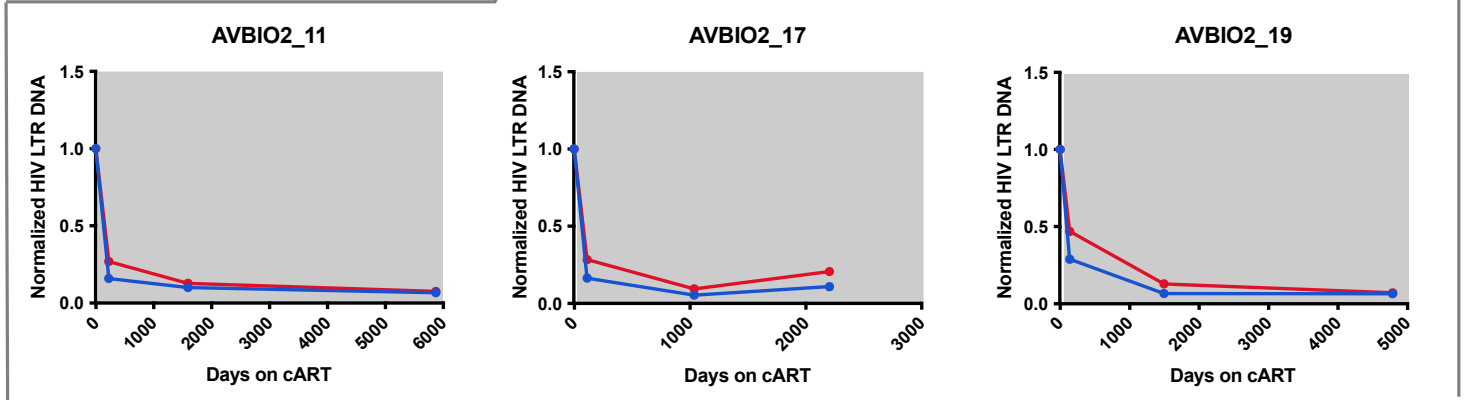

AIDS

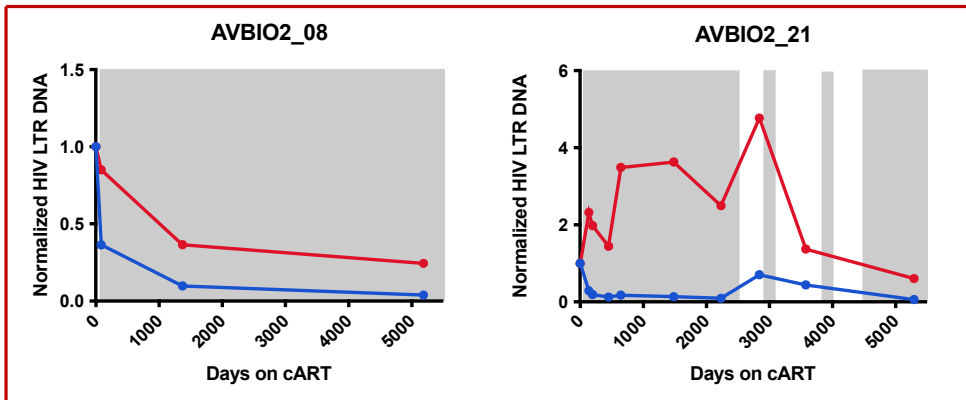

Supplemental Figure 3b

RECENT

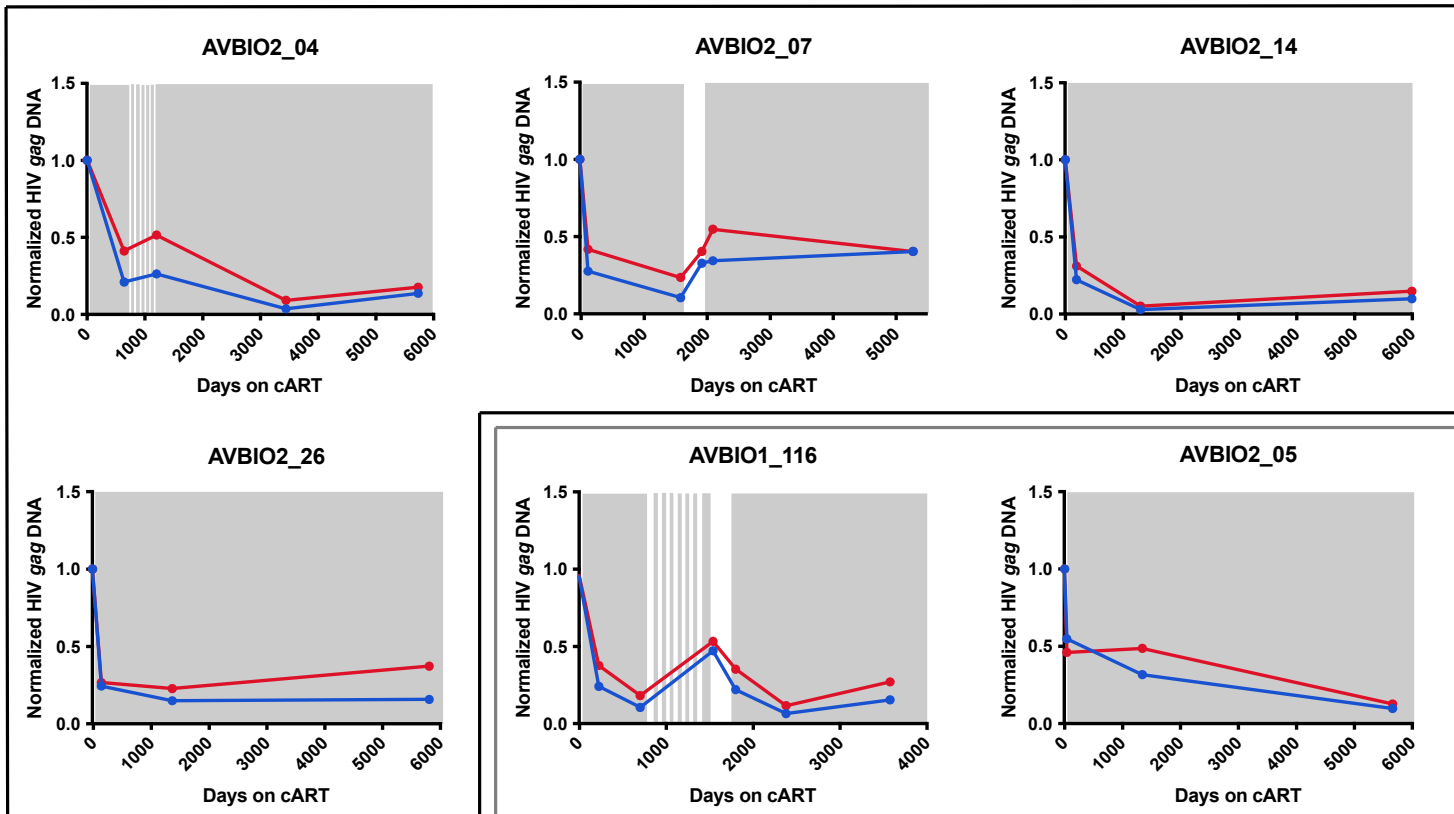

CHRONIC

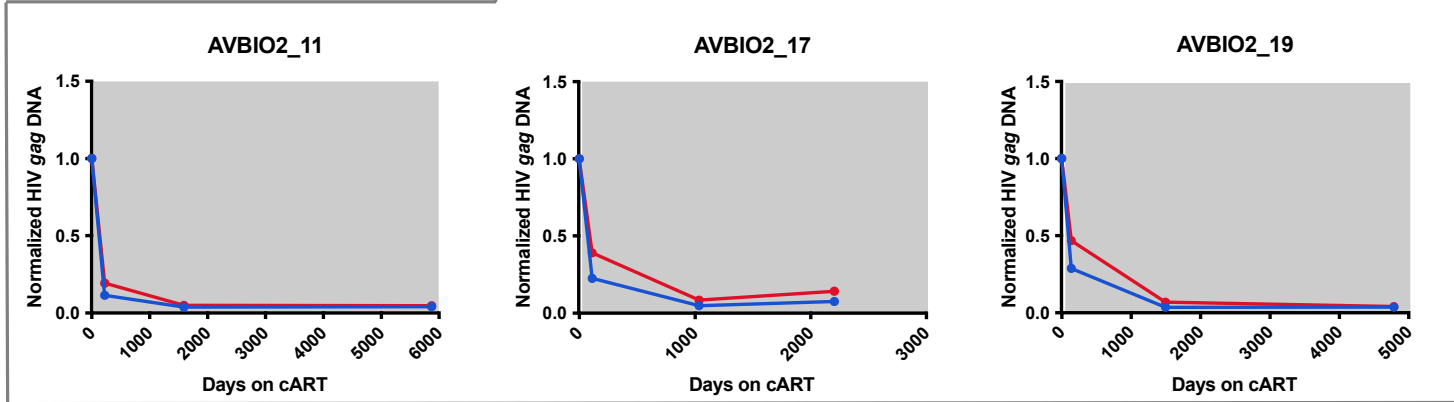

AIDS

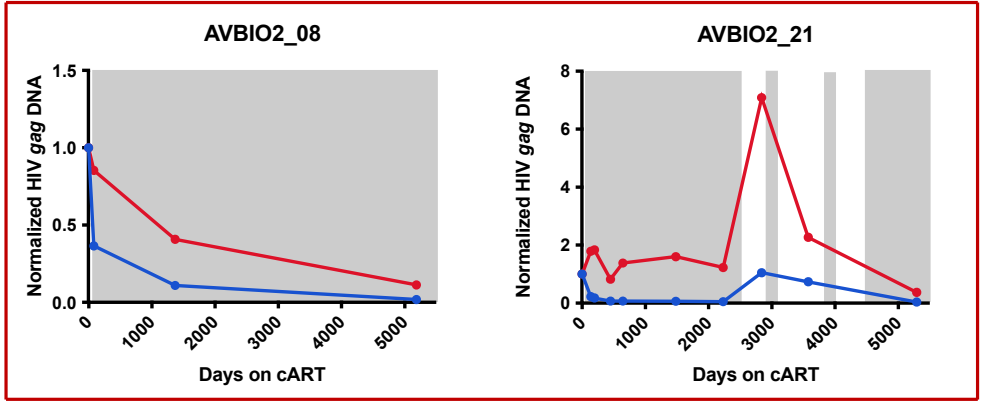

# Supplemental Figure 4

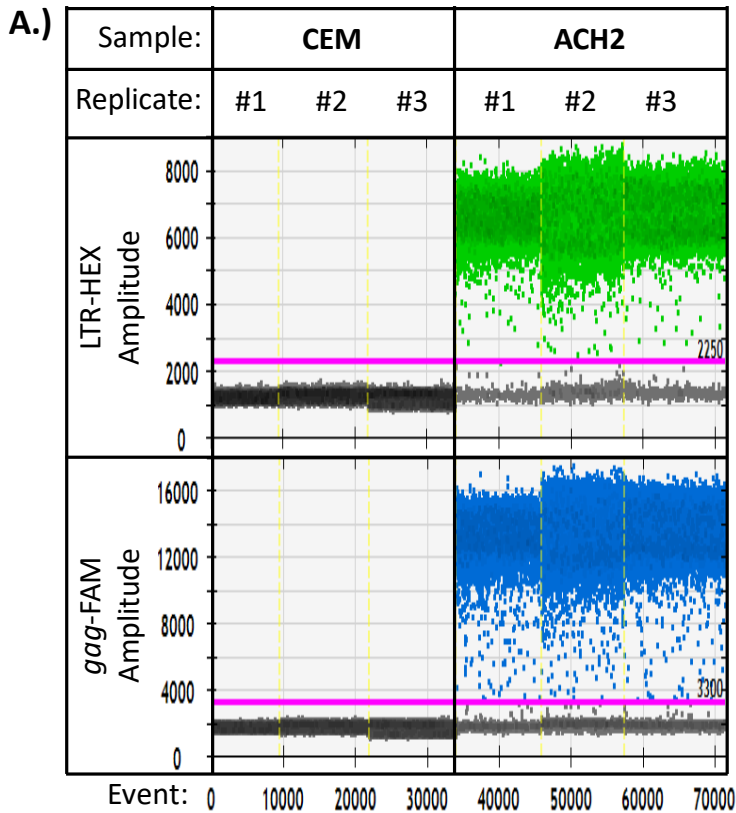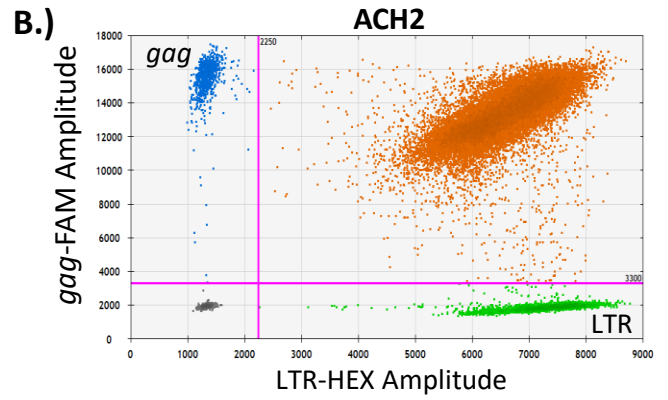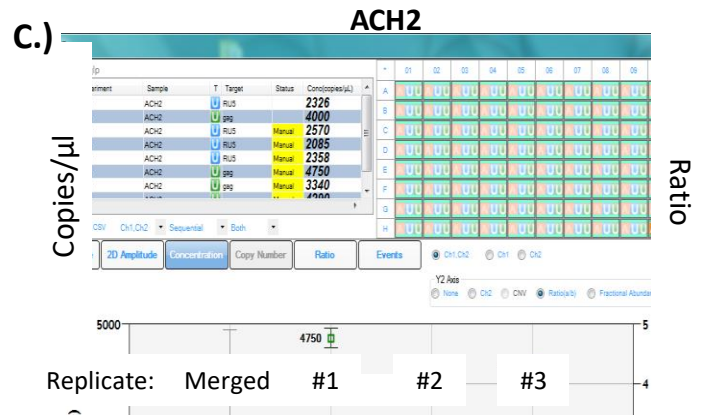

RECENT

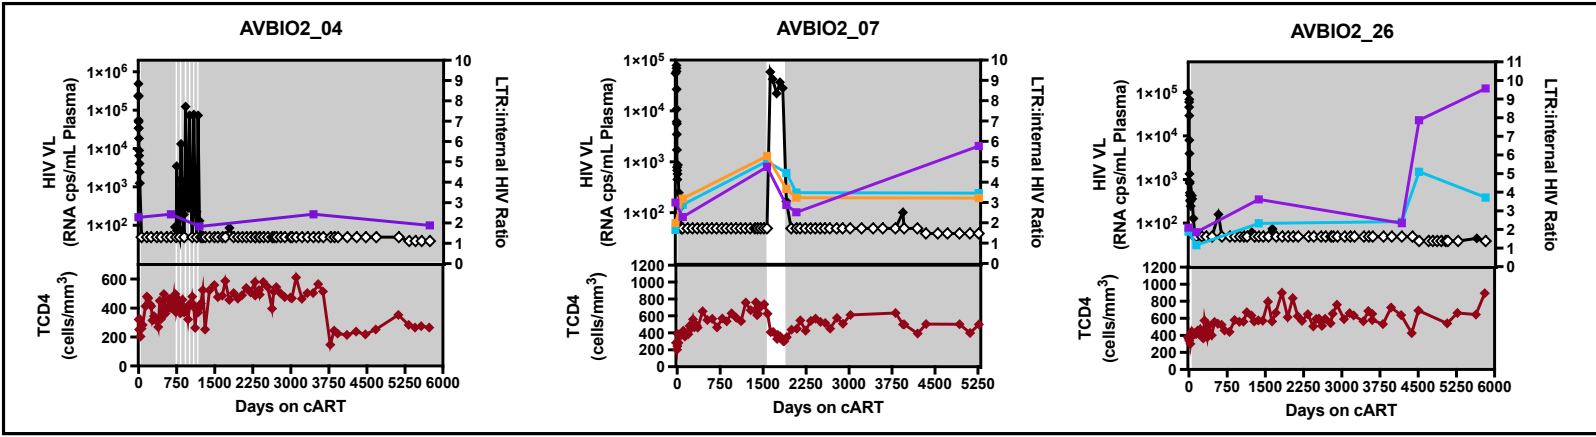

CHRONIC

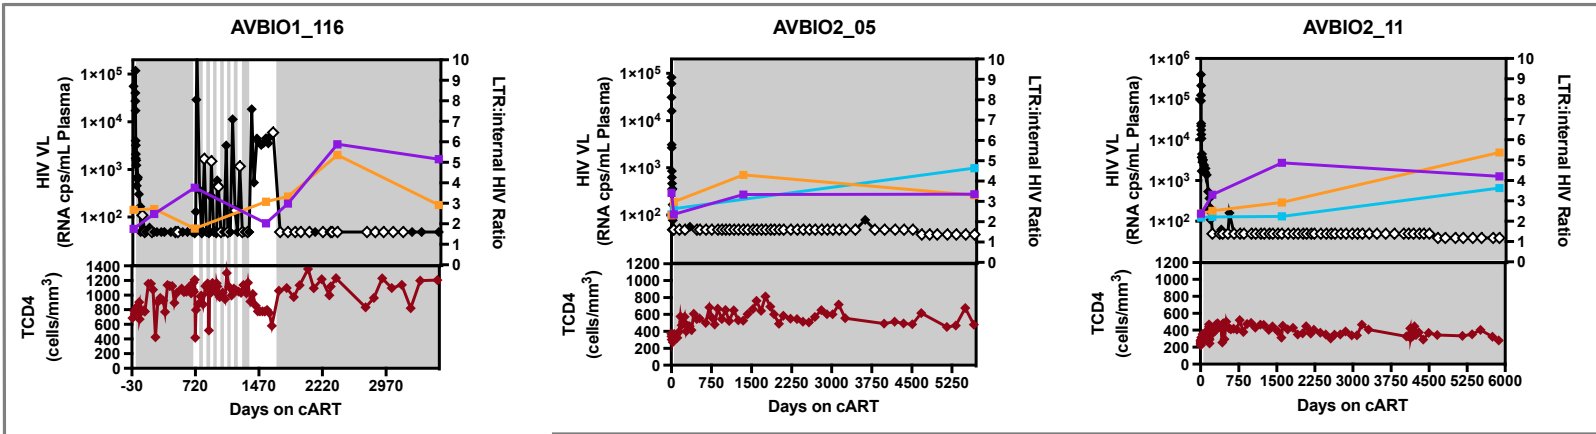

AIDS

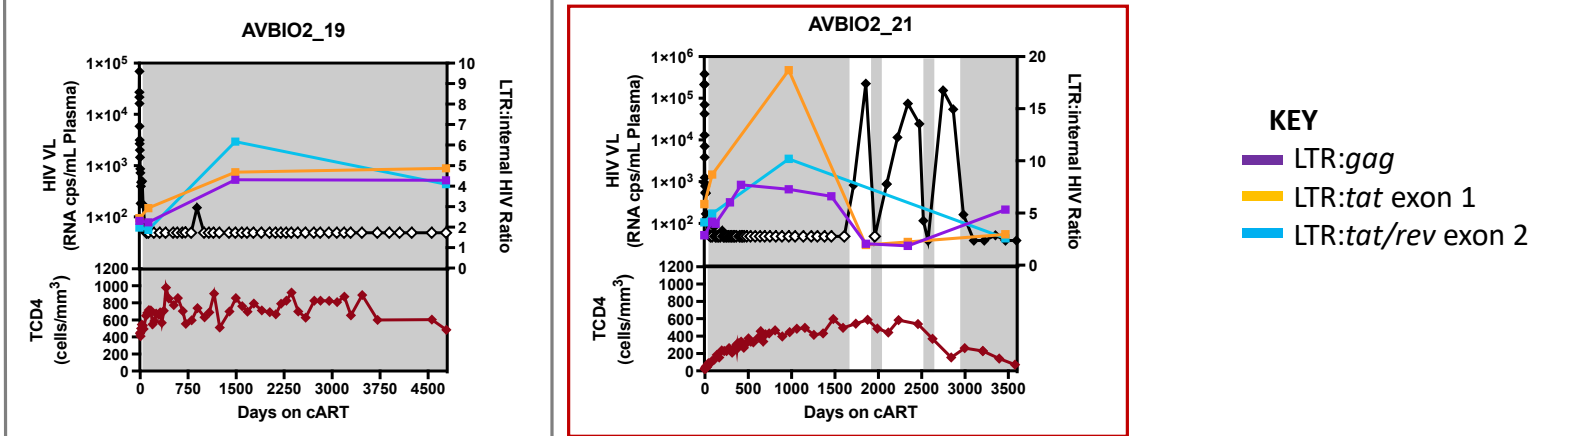

- KEY
- LTR:*gag*
  - LTR:*tat* exon 1
  - LTR:*tat/rev* exon 2

# Supplemental Figure 6

A.)

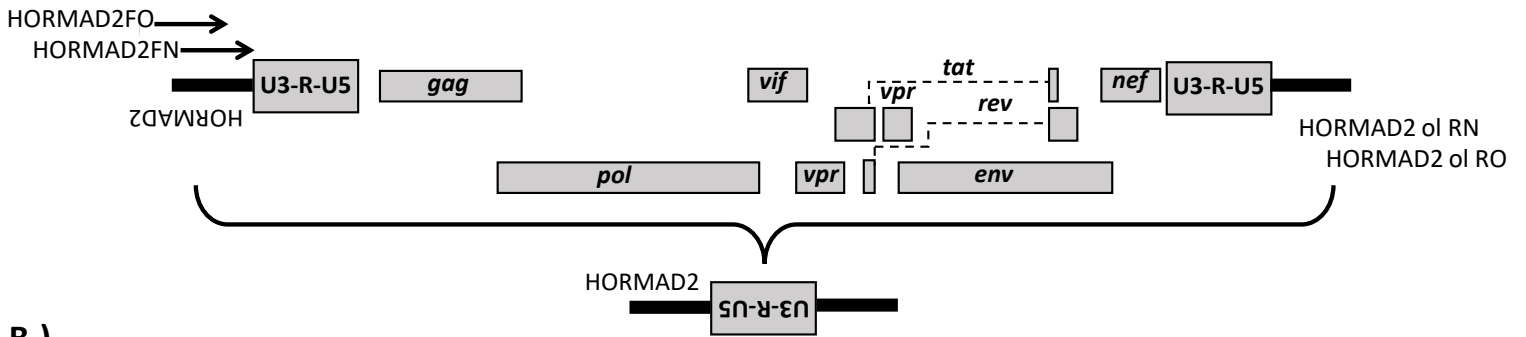

B.)

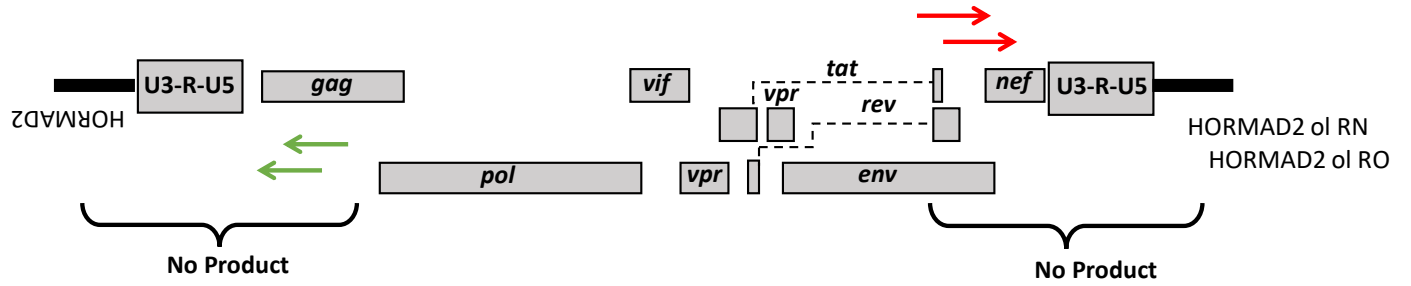

C.)

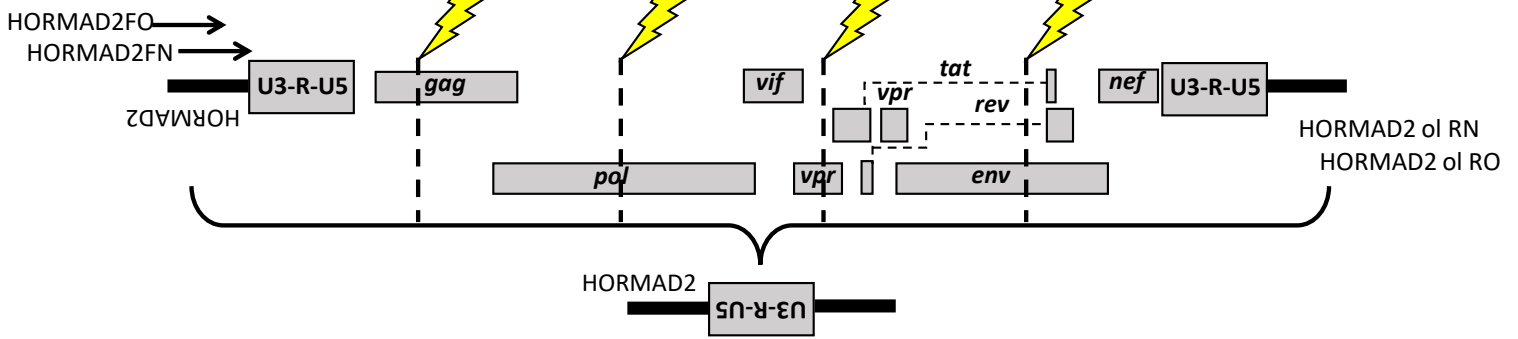

D.)

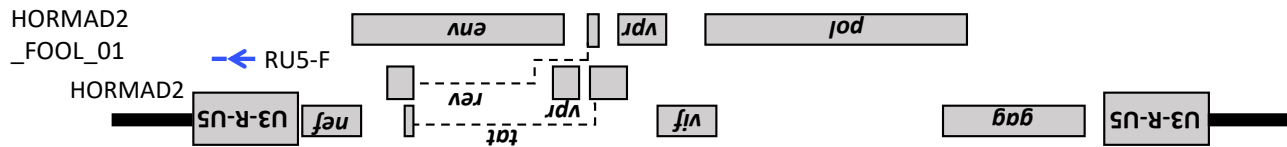

# Supplemental Figure 7

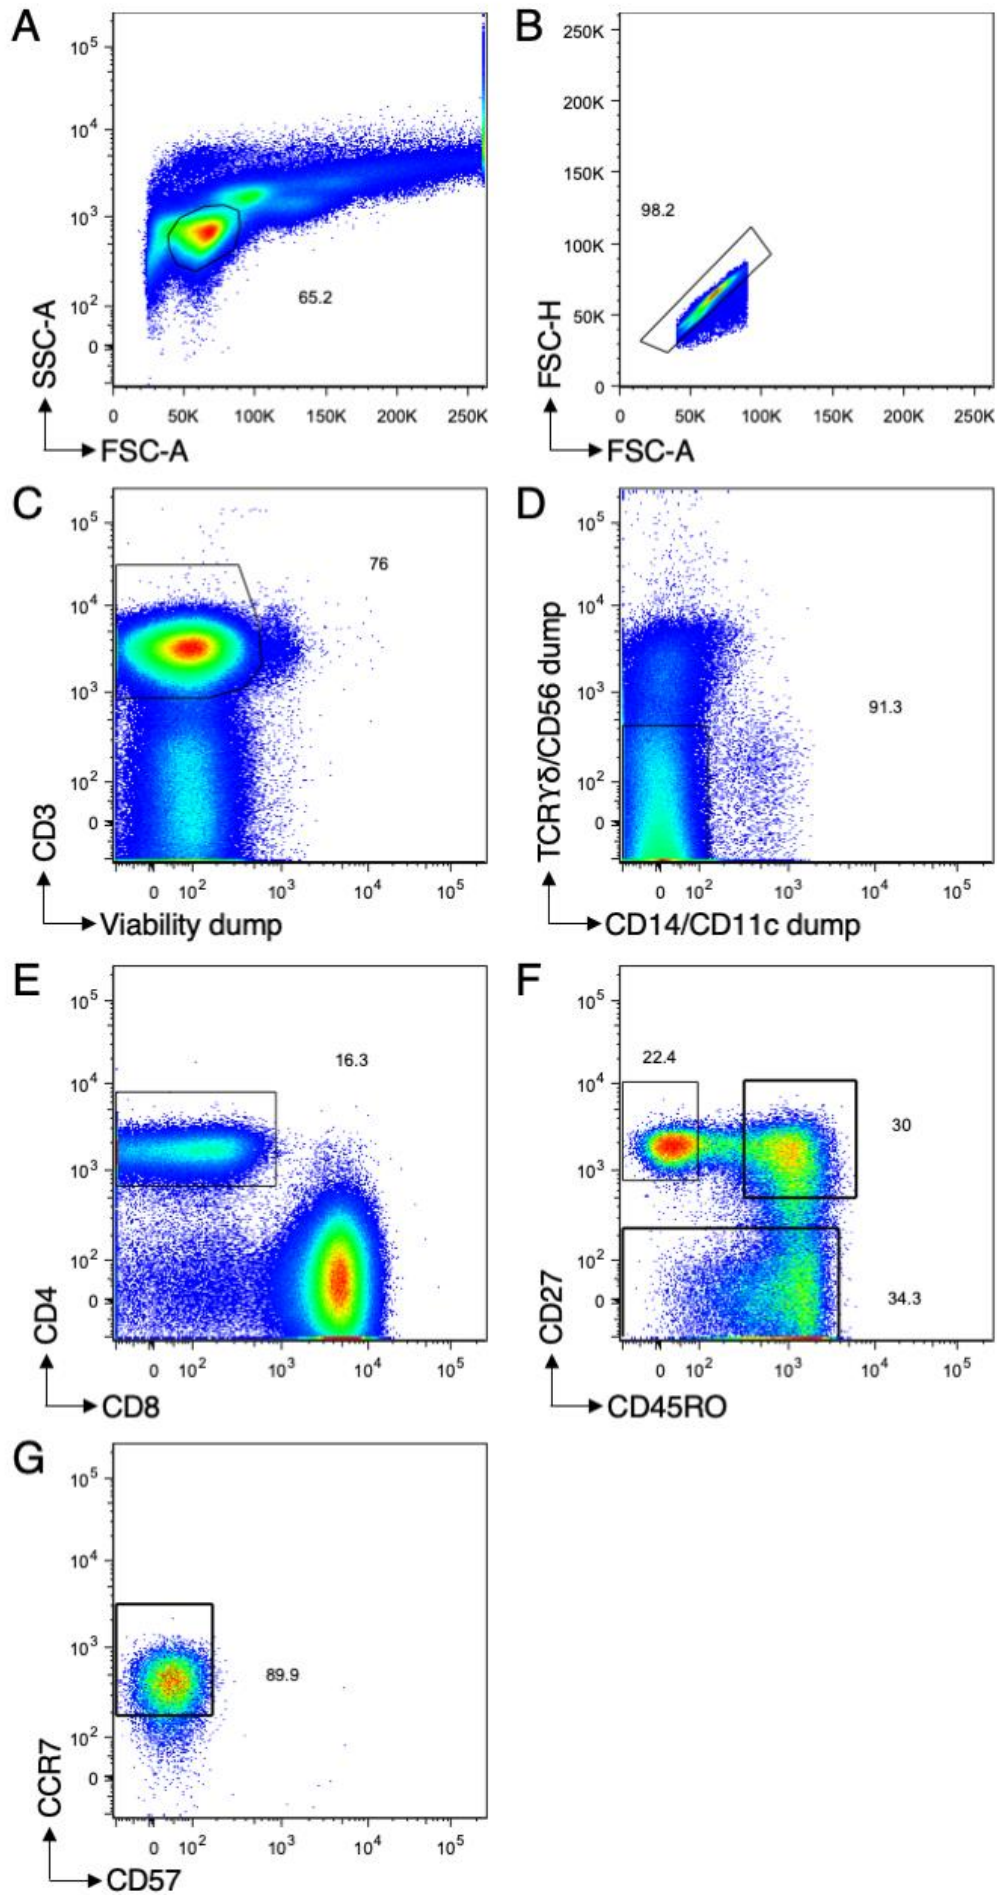



**Supplemental Table 1. Pre-cART study participant demographics and clinical information on study entry.**

| Baseline Infection Status       | PID        | Age upon cART initiation | Time since diagnosis (years)‡ | Gender | Race/Ethnicity     | Risk                           | Baseline HIV RNA (Log10 cps/mL) | Baseline TCD4 (cells/μL) | Baseline CD4% |
|---------------------------------|------------|--------------------------|-------------------------------|--------|--------------------|--------------------------------|---------------------------------|--------------------------|---------------|
| *Recent HIV infection (<1 year) | AVBIO2_04  | 39                       | 0.52                          | M      | White/Hispanic     | MSM/Shared Needles for Tattoos | 5.38                            | 321                      | 28%           |
|                                 | AVBIO2_07  | 33                       | 0.04                          | M      | White/Non Hispanic | MSM                            | 4.84                            | 282                      | 20%           |
|                                 | AVBIO2_14  | 32                       | 0.21                          | M      | White/Non Hispanic | MSM                            | 5.86                            | 479                      | 29%           |
|                                 | AVBIO2_26  | 46                       | 0.27                          | M      | Black/Not Hispanic | MSM                            | 4.78                            | 379                      | 4%            |
| Chronic HIV Infection (>1 year) | AVBIO1_116 | 37                       | 0.19                          | M      | White/Non Hispanic | MSM                            | 4.74                            | 687                      | 23%           |
|                                 | AVBIO2_05  | 34                       | 0.29                          | M      | Black/Not Hispanic | Bisexual                       | 4.53                            | 373                      | 20%           |
|                                 | AVBIO2_11  | 39                       | 0.85                          | M      | White/Non Hispanic | MSM                            | 5.1                             | 283                      | 17%           |
|                                 | aAVBIO2_17 | 25                       | 1.01                          | F      | Black/Not Hispanic | Heterosexual                   | 4.31                            | 258                      | 16%           |
|                                 | AVBIO2_19  | 29                       | 0.42                          | M      | Black/Not Hispanic | Heterosexual                   | 4.43                            | 440                      | 25%           |
| HIV/AIDS                        | AVBIO2_08  | 50                       | 0.11*                         | M      | Black/Not Hispanic | Bisexual                       | 4.88                            | 62                       | 6%            |
|                                 | bAVBIO2_21 | 51                       | 14.8                          | M      | Black/Not Hispanic | MSM                            | 5.58                            | 23                       | 2%            |
| MEDIAN:                         |            | 37                       | 0.36                          |        |                    |                                | 4.84                            | 321                      | 20%           |

‡Years between the date of first positive Western Blot and cART initiation

\*History of recent HIV infection based on prior non-reactive ELISA or documented seroconversion event

aPatient 2 in Maldarelli et al. Science 2014 [15]

bPatient 3 in Maldarelli et al. Science

2014 [15]

**Supplemental Table 2. Median HIV-1 DNA copies per million PBMC for each primer/probe target from participants at timepoints before and after cART initiation.**

|                                           | Timepoint        |                 |                 |                  |
|-------------------------------------------|------------------|-----------------|-----------------|------------------|
|                                           | Pre-cART         | Suppression     | 3rd Phase       | Long-term        |
| Days on continuous suppressive cART       |                  |                 |                 |                  |
| Median (Q1-Q3)                            | NA               | 139 (110-181)   | 1342 (868-1433) | 5423 (4148-5825) |
| Min-Max                                   | NA               | 40-224          | 642-1590        | 2205-5990        |
| Total CD4 count (cells/mm3)               |                  |                 |                 |                  |
| Median (Q1-Q3)                            | 321 (252-410)    | 421 (339-615)   | 573 (425-728)   | 486 (455-616)    |
| Min-Max                                   | 23-687           | 145-1074        | 230-1173        | 278-895          |
| HIV LTR DNA (copies/1e6 PBMCs)            |                  |                 |                 |                  |
| Median (Q1-Q3)                            | 3659 (2164-6690) | 1887 (854-2749) | 812 (425-1311)  | 843 (649-1042)   |
| Min-Max                                   | 1498-8332        | 361-3803        | 231-5206        | 290-4504         |
| HIV gag DNA (copies/1e6 PBMCs)            |                  |                 |                 |                  |
| Median (Q1-Q3)                            | 1199 (910-2647)  | 711 (422-1036)  | 194 (121-390)   | 229 (122-257)    |
| Min-Max                                   | 715-3579         | 265-1263        | 93-675          | 102-726          |
| HIV tat exon 1 DNA (copies/1e6 PBMCs)     |                  |                 |                 |                  |
| Median (Q1-Q3)                            | 1917 (769-2870)  | 747 (402-783)   | 197 (105-273)   | 172 (120-169)    |
| Min-Max                                   | 625-3719         | 270-1188        | 70-471          | 88-345           |
| HIV tat/rev exon 2 DNA (copies/1e6 PBMCs) |                  |                 |                 |                  |
| Median (Q1-Q3)                            | 2463 (889-3541)  | 710 (455-885)   | 157 (126-255)   | 189 (139-220)    |
| Min-Max                                   | 795-4475         | 312-1517        | 71-613          | 62-321           |

**Supplemental Table 3. Unique integration sites from HIV-infected cell clones found in CTM and EM subsets of one individual.**

| Gene     | CTM    |           |           | EM     |           |           | Fisher's Exact p-value |
|----------|--------|-----------|-----------|--------|-----------|-----------|------------------------|
|          | Number | Frequency | Copies/ml | Number | Frequency | Copies/ml |                        |
| ANKRD13D | 4      | 1.2%      | 26.9      | 0      | 0.0%      | <12       | 0.51                   |
| KCTD13   | 3      | 0.9%      | 20.1      | 0      | 0.0%      | <12       | 0.18                   |
| ZNF564   | 1      | 0.3%      | 6.6       | 1      | 0.3%      | 11.2      | 1                      |
| FCGBP    | 1      | 0.3%      | 6.6       | 4      | 1.1%      | 44.3      | 0.38                   |
| HORMAD2  | 1      | 0.3%      | 6.6       | 65     | 18.1%     | 720.1     | 0.0001***              |
| TSG101   | 0      | 0.0%      | <6.9      | 18     | 5.0%      | 199.4     | 0.0001***              |
| TGFBR3   | 0      | 0.0%      | <6.9      | 12     | 3.3%      | 132.8     | 0.0005***              |
| YPEL1    | 0      | 0.0%      | <6.9      | 10     | 2.8%      | 110.8     | 0.0020**               |
| SLX4     | 0      | 0.0%      | <6.9      | 9      | 2.5%      | 99.7      | 0.0040**               |
| CKAP5    | 0      | 0.0%      | <6.9      | 9      | 2.5%      | 99.7      | 0.0040**               |
| HELB     | 0      | 0.0%      | <6.9      | 6      | 1.7%      | 66.6      | 0.0080*                |
| DNAH6    | 0      | 0.0%      | <6.9      | 5      | 1.4%      | 55.4      | 0.06                   |
| C7orf59a | 0      | 0.0%      | <6.9      | 4      | 1.1%      | 44.3      | 0.13                   |
| GRIP1    | 0      | 0.0%      | <6.9      | 4      | 1.1%      | 44.3      | 0.13                   |
| PPIL2    | 0      | 0.0%      | <6.9      | 4      | 1.1%      | 44.3      | 0.13                   |
| PELP1    | 0      | 0.0%      | <6.9      | 4      | 1.1%      | 44.3      | 0.13                   |
| KCTD13   | 0      | 0.0%      | <6.9      | 3      | 0.8%      | 33.1      | 0.25                   |
| EMR4P    | 0      | 0.0%      | <6.9      | 3      | 0.8%      | 33.1      | 0.25                   |
| GNB1     | 0      | 0.0%      | <6.9      | 3      | 0.8%      | 33.1      | 0.25                   |
| CPEB2    | 0      | 0.0%      | <6.9      | 3      | 0.8%      | 33.1      | 0.25                   |
| PRKCB    | 0      | 0.0%      | <6.9      | 3      | 0.8%      | 33.1      | 0.25                   |
| ANKRD13D | 0      | 0.0%      | <6.9      | 2      | 0.6%      | 22.3      | 0.5                    |
| C7orf59b | 0      | 0.0%      | <6.9      | 2      | 0.6%      | 22.3      | 0.5                    |
| GSTO1    | 0      | 0.0%      | <6.9      | 2      | 0.6%      | 22.3      | 0.5                    |
| MIR1208  | 0      | 0.0%      | <6.9      | 2      | 0.6%      | 22.3      | 0.5                    |
| SMARCE1  | 0      | 0.0%      | <6.9      | 2      | 0.6%      | 22.3      | 0.5                    |
| TGFBR3   | 0      | 0.0%      | <6.9      | 2      | 0.6%      | 22.3      | 0.5                    |

**Supplemental Table 4. Primer probe sets for DNA quantification by ddPCR.**

| Target                   | Primer Name           | Sequence                                                                     | Reference                                               |
|--------------------------|-----------------------|------------------------------------------------------------------------------|---------------------------------------------------------|
| CCR5                     | hCCR5-F1              | 5'-CCA GAA GAG CTG AGA CAT CCG-3'                                            | Thomas, J.A. et al.,<br>2006, Virology                  |
|                          | hCCR5-R1              | 5'-GCC AAG CAG CTG AGA GGT TAC T-3'                                          |                                                         |
|                          | FAM-hCCR5-P01         | 5'-/56-FAM/-TCC CCT ACA AGA AAC TCT CCC CGG-/3BHQ_1/-3'                      |                                                         |
| LTR                      | RU5-F                 | <b>5'-CTT AAG CCT CAA TAA AGC TTG CC-3'</b>                                  | Anderson, E.M. et al.,<br>2018 Curr Protoc<br>Microbiol |
|                          | RU5-R                 | <b>5'-GGA TCT CTA GTT ACC AGA GTC-3'</b>                                     |                                                         |
|                          | RU5-Probe             | <b>5'-/5HEX/ -AGT AGT GTG TGC CCG TCT G-/ZEN//3laBkFQ/-3'</b>                |                                                         |
| <i>gag</i>               | HIV SCA 6F            | <b>5'-CAT GTT TTC AGC ATT ATC AGA AGG A-3'</b>                               | Palmer, S. et al.,<br>2003, J. Clin<br>Microbiol        |
|                          | HIV SCA 84R           | <b>5'-TGC TTG ATG TCC CCC CAC T-3'</b>                                       |                                                         |
|                          | HIV SCA probe 32t ZEN | <b>5'-/56-FAM/-CCA CCC CAC AAG ATT TAA ACA CCA TGC TAA-/ZEN//3laBkFQ/-3'</b> |                                                         |
| <i>tat</i> Exon 1        | TatRev1_F             | <b>5'-GCA TCC AGG AAG TCA GCC TA-3'</b>                                      | Anderson, E.M. et al.,<br>2018 Curr Protoc<br>Microbiol |
|                          | TatRev1_R             | <b>5'-CTT CGT CGC TGT CTC CGC-3'</b>                                         |                                                         |
|                          | TatRev1_probe         | <b>5'-/5HEX/ -TC TTC CTG CCA TAG GAG ATG C-/3BHQ_1/-3'</b>                   |                                                         |
| <i>tat/rev</i><br>Exon 2 | TatRev2_F             | <b>5'-GTG AAT AGA GTT AGG CAG GGA TA-3'</b>                                  | Anderson, E.M. et al.,<br>2018 Curr Protoc<br>Microbiol |
|                          | msRNA-R               | <b>5'-GTC TCT GTC TCT CTC TCC ACC-3'</b>                                     |                                                         |
|                          | msRNA Probe           | <b>5'-/56-FAM/-TCG GGC CTG TCG GGT CC-/3BHQ_1/-3'</b>                        |                                                         |
| <i>HORMAD2</i>           | RU5-F                 | <b>5'-CTT AAG CCT CAA TAA AGC TTG CC-3'</b>                                  |                                                         |
|                          | HORMAD2_FOOL_01       | 5'-CCT GTG CCT AGG GTA GAT AAT ACT <b>GCT AGA G-3'</b>                       |                                                         |
|                          | RU5-Probe             | <b>5'-/5HEX/ -AGT AGT GTG TGC CCG TCT G-/ZEN//3laBkFQ/-3'</b>                |                                                         |
| <i>AMBI1</i>             | RU5-F                 | <b>5'-CTT AAG CCT CAA TAA AGC TTG CC-3'</b>                                  |                                                         |
|                          | AMBI1_ROOL_01         | 5'-CGC TTC ATT AGC ACT TAC <b>TGC TAG AG-3'</b>                              |                                                         |
|                          | RU5-Probe             | <b>5'-/5HEX/ -AGT AGT GTG TGC CCG TCT G-/ZEN//3laBkFQ/-3'</b>                |                                                         |

**Bold Text indicates HIV specific sequences**

**Supplemental Table 5. *HORMAD2* proviral characterization strategy primers.** Nested primer sets for the characterization of a unique provirus integrated into the *HORMAD2* gene of participant AVBIO2\_21. Bold text indicates HIV specific sequence.

HORMAD2 Integrant Mapping Strategy

| Strategy                   | Primer Name   | Sequence                             |
|----------------------------|---------------|--------------------------------------|
| Forward Human Outer        | HORMAD2FO     | CTCAACTGCTATGCCTAGATAGCG             |
| Forward Human Nested       | HORMAD2FN     | GATATAGCCAGCCTGTGCC                  |
| Reverse Overlapping Outer  | HORMAD2 oI RO | CAAATAGTCCAAGGGTATTT <b>TGGAAGGG</b> |
| Reverse Overlapping Nested | HORMAD2 oI RN | GGTATTT <b>TGGAAGGGCTAATTTACTCCA</b> |
